# Supplementary material
Source: PubMed Central journal article supplement (PMC6751973)
Supplement: appendix_2.pdf [file appendix_2.pdf]

1 **Appendix. Antibiotic choice for prophylaxis of surgical site infection according to Indonesian and**  
 2 **international guidelines.**

| Surgery classification                              | American Society of Health-System Pharmacists 2013 <sup>4</sup>                  | Scottish Intercollegiate Guidelines Network (SIGN) 2014 <sup>5</sup>                                                                                                          | Indonesian Ministry of Health (IMOH) 2011 <sup>6</sup>                                                | Regional Public Hospital Dr. Soetomo 2009 <sup>7</sup>  |
|-----------------------------------------------------|----------------------------------------------------------------------------------|-------------------------------------------------------------------------------------------------------------------------------------------------------------------------------|-------------------------------------------------------------------------------------------------------|---------------------------------------------------------|
| Caesarean delivery                                  | Cefazolin                                                                        | Flucloxacillin, macrolides and clindamycin. <sup>2</sup>                                                                                                                      | First and second generation cephalosporins, added with metronidazole if anaerobes organism suspected. | Amoxicillin-clavulanat, cefazolin                       |
| Laparoscopic procedure (elective, high-risk)        | Cefazolin, cefoxitin, cefotetan, ceftriaxone <sup>1</sup> , ampicillin-sulbactam | Metronidazole, amoxicillin-clavulanate. <sup>3</sup> Second generation cephalosporins, beta-lactam drug combined with a beta-lactamase inhibitor, or gentamicin. <sup>3</sup> |                                                                                                       | Ceftriaxone + metronidazole, cefuroxime + metronidazole |
| Head surgeries (clean with placement of prosthesis) | Cefazolin, cefuroxime                                                            | Metronidazole, amoxicillin-clavulanate. <sup>4</sup>                                                                                                                          |                                                                                                       | Cefazolin                                               |
| Orthopaedic procedures                              | Cefazolin                                                                        | Flucloxacillin, macrolides and clindamycin. <sup>2</sup>                                                                                                                      |                                                                                                       | Cefazolin                                               |
| Appendectomy                                        | Cefoxitin, cefotetan, cefazolin + metronidazole                                  | Metronidazole, amoxicillin-clavulanate. <sup>3</sup> Second generation cephalosporins, beta-lactam drug combined with a beta-lactamase inhibitor, or gentamicin. <sup>3</sup> |                                                                                                       | Cefazolin + metronidazole, cefuroxime                   |

3

4 Note: <sup>1</sup> Ceftriaxone use should be limited to patients requiring antimicrobial treatment for acute cholecystitis or  
 5 acute biliary tract infection. <sup>2</sup> Surgical site infection organism for a skin wound at any site: *Staphylococcus*  
 6 *aureus*, Beta-haemolytic streptococci (BHS) susceptible to flucloxacillin, macrolides and clindamycin. <sup>3</sup>  
 7 Anaerobes, *E. coli* and Enterobacteriaceae are an additional pathogens (to *S. aureus* and BHS) by site of  
 8 infection: anaerobes susceptible to metronidazole and amoxicillin-clavulanate; *E. coli* and Enterobacteriaceae  
 9 susceptible to second generation cephalosporins, beta-lactam drug combined with a beta-lactamase inhibitor, or  
 10 gentamicin. <sup>4</sup> Oral anaerobes is an additional pathogens (to *S. aureus* and BHS) by site of infection susceptible  
 11 to metronidazole and amoxicillin-clavulanate.

12

13
